# Supplementary material for: Genome-wide identification of transcriptional targets of RORA reveals direct regulation of multiple genes associated with autism spectrum disorder
Source: Mol Autism. 2013 May 22;4:14. doi: 10.1186/2040-2392-4-14 (PMC3665583; doi:10.1186/2040-2392-4-14)
Supplement: Additional file 5 — A table presenting annotation clusters 2 to 5 resulting from gene ontology analysis of the ChIP-on-chip gene dataset using DAVID Bioinformatics Resources 6.7. [file 2040-2392-4-14-S5.xls]

## Sheet: Sheet1
Category	Term	Count	PValue	Benjamini	Genes
Annotation Cluster 2	Enrichment Score: 4.740
SP_PIR_KEYWORDS	cell adhesion	29	3.64323e-07	5.22183e-05	CTNND2, NINJ1, ITGB5, CDH8, DGCR2, SORBS3, LAMB2, CDH9, CD44, FAT1, TRO, PVRL3, ZYX, NEGR1, FN1, SELL, PCDH11X, NLGN1, PCDH8, PCDH19, CTNNA2, FREM3, LAMA5, DSC2, CNTN4, ITGAD, CNTN3, NTM, CDH11
GOTERM_BP_FAT	GO:0007155~cell adhesion	39	1.72081e-05	0.00310062	MIA, MTSS1, CDK5R1, CTNND2, ITGB5, NINJ1, APOA4, CDH8, SORBS3, DGCR2, LAMB2, CDH9, CD44, PVRL3, TRO, FAT1, ZYX, NEGR1, FN1, MAGI1, TAOK2, SELL, PCDH11X, NLGN1, ACTN1, PCDH8, PCDH19, CTNNA2, AMBP, FREM3, LAMA5, GPR56, CX3CR1, DSC2, ITGAD, CNTN4, CNTN3, NTM, CDH11
GOTERM_BP_FAT	GO:0022610~biological adhesion	39	1.72466e-05	0.00288589	MIA, MTSS1, CDK5R1, CTNND2, ITGB5, NINJ1, APOA4, CDH8, SORBS3, DGCR2, LAMB2, CDH9, CD44, PVRL3, TRO, FAT1, ZYX, NEGR1, FN1, MAGI1, TAOK2, SELL, PCDH11X, NLGN1, ACTN1, PCDH8, PCDH19, CTNNA2, AMBP, FREM3, LAMA5, GPR56, CX3CR1, DSC2, ITGAD, CNTN4, CNTN3, NTM, CDH11
GOTERM_BP_FAT	GO:0016337~cell-cell adhesion	18	0.00101191	0.0842097	CDK5R1, PCDH11X, CTNND2, NLGN1, PCDH8, PCDH19, CTNNA2, APOA4, CDH8, CDH9, CD44, TRO, PVRL3, FAT1, DSC2, ITGAD, CNTN4, CDH11
Annotation Cluster 3	Enrichment Score: 4.616
GOTERM_CC_FAT	GO:0044459~plasma membrane part	94	1.53766e-07	5.65843e-05	KCNC1, GYPC, GRIK2, SLC20A2, SLC7A8, SDC4, VIPR2, ATP2B2, SLC1A3, ANK2, CD44, ANK3, CXCR4, AP3B2, GNG2, ZYX, ATP6V0D1, HTR5A, EBAG9, SCAMP5, KCND3, LYN, MAGI1, PCDH11X, ACTN1, PCDH8, ARHGAP24, CTNNA2, BCAP31, SSTR2, CHRM1, CX3CR1, LCK, GPR56, COPG, HS3ST3B1, KCNH4, LCP1, SPTB, RAB3A, CDK5R1, SCN1A, APH1A, ADORA2A, CABP1, CTNND2, ITGB5, KIT, RIMS2, AMPH, RIMS3, EPHB2, SORBS3, FGG, SYPL1, TRO, FAT1…
GOTERM_CC_FAT	GO:0031226~intrinsic to plasma membrane	52	0.000213483	0.0097732	GYPC, KCNC1, SLC20A2, GRIK2, SLC7A8, SDC4, VIPR2, CD44, CXCR4, ZYX, HTR5A, KCND3, LYN, PCDH11X, PCDH8, BCAP31, SSTR2, CHRM1, GPR56, CX3CR1, KCNH4, HS3ST3B1, SPTB, SCN1A, APH1A, ADORA2A, ITGB5, EPHB2, SYPL1, FAT1, TRO, SCN5A, GABRA4, KCNB2, SELL, MET, ATRN, TGFBR2, GRIN1, NTNG1, NLGN1, HOMER1, EPHA3, CYBA, SLC7A2, NTRK1, NTRK2, ADRA1B, MTNR1B, ITGAD, MERTK, ABCC5
GOTERM_CC_FAT	GO:0005887~integral to plasma membrane	50	0.000431214	0.0143256	GYPC, KCNC1, SLC20A2, GRIK2, SLC7A8, SDC4, VIPR2, CD44, CXCR4, ZYX, HTR5A, KCND3, LYN, PCDH11X, PCDH8, BCAP31, SSTR2, CHRM1, GPR56, CX3CR1, KCNH4, HS3ST3B1, SCN1A, APH1A, ADORA2A, ITGB5, EPHB2, SYPL1, FAT1, TRO, SCN5A, GABRA4, KCNB2, SELL, MET, ATRN, TGFBR2, GRIN1, NLGN1, HOMER1, EPHA3, CYBA, SLC7A2, NTRK1, NTRK2, ADRA1B, MTNR1B, ITGAD, MERTK, ABCC5
Annotation Cluster 4	Enrichment Score: 3.456
GOTERM_BP_FAT	GO:0044057~regulation of system process	24	7.1065e-06	0.00237887	RAB3A, NOS1, ADORA2A, KCNB2, GRIK2, GRIN1, CTNND2, NLGN1, KIT, SDC4, PTPN11, EPHB2, APOA4, ATP2B2, BDNF, SSTR2, SLC1A3, NTRK2, IFNG, ADRA1B, IL1B, CNTN4, CACNA1C, SCN5A
GOTERM_BP_FAT	GO:0051969~regulation of transmission of nerve impulse	14	0.000131681	0.0161288	RAB3A, GRIK2, ADORA2A, GRIN1, CTNND2, NLGN1, KIT, EPHB2, ATP2B2, BDNF, SLC1A3, IFNG, NTRK2, CNTN4
GOTERM_BP_FAT	GO:0031644~regulation of neurological system process	14	0.000196667	0.021733	RAB3A, GRIK2, ADORA2A, GRIN1, CTNND2, NLGN1, KIT, EPHB2, ATP2B2, BDNF, SLC1A3, IFNG, NTRK2, CNTN4
GOTERM_BP_FAT	GO:0050804~regulation of synaptic transmission	13	0.000242476	0.0255284	RAB3A, GRIK2, ADORA2A, GRIN1, NLGN1, CTNND2, KIT, EPHB2, ATP2B2, BDNF, SLC1A3, NTRK2, CNTN4
GOTERM_BP_FAT	GO:0048167~regulation of synaptic plasticity	9	0.000255261	0.0257039	ATP2B2, BDNF, ADORA2A, GRIK2, GRIN1, CTNND2, CNTN4, KIT, EPHB2
GOTERM_BP_FAT	GO:0050767~regulation of neurogenesis	13	0.0014445	0.103624	CDK5R1, LYN, GRIN1, NLGN1, KIT, EPHB2, NUMBL, BDNF, METRN, CCND2, FOXG1, NTRK2, CNTN4
GOTERM_BP_FAT	GO:0051960~regulation of nervous system development	14	0.00168471	0.10983	CDK5R1, LYN, GRIN1, NLGN1, KIT, EPHB2, NUMBL, BDNF, METRN, CCND2, IFNG, FOXG1, NTRK2, CNTN4
GOTERM_BP_FAT	GO:0060284~regulation of cell development	13	0.00796963	0.280593	CDK5R1, LYN, GRIN1, NLGN1, KIT, EPHB2, NUMBL, BDNF, METRN, CCND2, FOXG1, NTRK2, CNTN4
Annotation Cluster 5	Enrichment Score: 3.176
GOTERM_CC_FAT	GO:0030054~cell junction	32	8.09962e-06	0.000744891	SCN1A, GRIK2, CABP1, CTNND2, RIMS2, SDC4, RIMS3, AMPH, SORBS3, CD44, PVRL3, DMD, OBSL1, ZYX, SCN5A, EBAG9, SCAMP5, MAGI1, GABRA4, DLGAP2, GRIN1, NLGN1, ACTN1, HOMER1, ARHGAP24, CTNNA2, CADPS2, CHRM1, DSC2, TJP2, LCP1, CDC42BPB
GOTERM_CC_FAT	GO:0014069~postsynaptic density	11	1.11704e-05	0.000821812	LYN, ADORA2A, DLGAP2, CHRM1, GRIN1, CABP1, NTRK2, NLGN1, CACNA1C, HOMER1, ITPR1
GOTERM_CC_FAT	GO:0045202~synapse	25	1.24463e-05	0.000763088	RAB3A, CDK5R1, GRIK2, ADORA2A, CABP1, RIMS2, RIMS3, AMPH, SLC1A3, SYPL1, ANK3, DMD, ATP6V0D1, SCAMP5, GABRA4, LYN, DLGAP2, GRIN1, NLGN1, HOMER1, ITPR1, CADPS2, CHRM1, NTRK2, CACNA1C
GOTERM_BP_FAT	GO:0007267~cell-cell signaling	33	0.000113114	0.0146352	RAB3A, ADORA2A, GRIK2, CAMK2G, VIPR2, AMPH, BDNF, SLC1A3, SYPL1, FAT1, DMD, APBA2, IL1B, ZYX, NOVA1, NOS1, LYN, DLGAP2, GRIN1, NLGN1, PCDH8, ESR2, HOMER1, CCL17, CTNNA2, SSTR2, CHRM1, GPR56, NTRK2, ADRA1B, MTNR1B, MERTK, CACNA1C
SP_PIR_KEYWORDS	cell junction	22	0.000296767	0.0115356	MAGI1, GABRA4, DLGAP2, GRIK2, GRIN1, CABP1, CTNND2, NLGN1, ARHGAP24, HOMER1, RIMS2, RIMS3, CTNNA2, AMPH, SORBS3, CADPS2, CHRM1, DSC2, ZYX, TJP2, LCP1, SCAMP5
GOTERM_CC_FAT	GO:0044456~synapse part	17	0.000537655	0.0163573	RAB3A, GABRA4, LYN, ADORA2A, DLGAP2, GRIK2, CABP1, GRIN1, NLGN1, HOMER1, ITPR1, AMPH, SYPL1, CHRM1, NTRK2, CACNA1C, ATP6V0D1
GOTERM_BP_FAT	GO:0007268~synaptic transmission	18	0.00229599	0.132301	RAB3A, NOS1, ADORA2A, DLGAP2, GRIK2, GRIN1, NLGN1, HOMER1, CTNNA2, AMPH, SLC1A3, SYPL1, CHRM1, DMD, MTNR1B, APBA2, CACNA1C, NOVA1
SP_PIR_KEYWORDS	synapse	13	0.00326629	0.056932	GABRA4, DLGAP2, GRIK2, CABP1, GRIN1, NLGN1, RIMS2, HOMER1, AMPH, RIMS3, CADPS2, CHRM1, SCAMP5
GOTERM_BP_FAT	GO:0019226~transmission of nerve impulse	19	0.00519248	0.228838	RAB3A, SCN1A, NOS1, ADORA2A, DLGAP2, GRIK2, GRIN1, NLGN1, HOMER1, CTNNA2, AMPH, SLC1A3, SYPL1, CHRM1, DMD, MTNR1B, APBA2, CACNA1C, NOVA1
SP_PIR_KEYWORDS	postsynaptic cell membrane	8	0.012078	0.135102	GABRA4, GRIK2, DLGAP2, CHRM1, GRIN1, CABP1, NLGN1, HOMER1
GOTERM_CC_FAT	GO:0045211~postsynaptic membrane	9	0.0215907	0.181932	GABRA4, ADORA2A, GRIK2, DLGAP2, CHRM1, GRIN1, CABP1, NLGN1, HOMER1
GOTERM_BP_FAT	GO:0050877~neurological system process	43	0.0369142	0.52659	RAB3A, OR1C1, SCN1A, ADORA2A, GRIK2, CTNND2, PAX3, KIT, OR2L13, AMPH, EPHB2, ATP2B2, TYR, BDNF, SYPL1, SLC1A3, DMD, MKKS, APBA2, IL1B, ACSL4, LHX8, NOVA1, NOS1, DLGAP2, GRIN1, NLGN1, RPGRIP1, NR4A3, ESR2, HOMER1, SOD2, CTNNA2, PITPNM3, FYN, PPEF1, CHRM1, ADRA1B, MTNR1B, CACNA1F, MERTK, CACNA1C, TAS2R10
